# Supplementary material for: Variable pitch hydrodynamic electro-optic gratings utilising bent liquid crystal dimers
Source: Royal Society of Chemistry journal article supplement (doi:10.1039/d0sm01425g), 2020-01-01
Supplement: d0sm01425g1.pdf [file d0sm01425g1.pdf]

## Supplementary Information

### Variable Pitch Hydrodynamic Electro-Optic Gratings Utilising Bent Liquid Crystal Dimers

R. Morris, J. C Jones and M. Nagaraj

*School of Physics and Astronomy, University of Leeds, Leeds LS2 9JT, UK.*

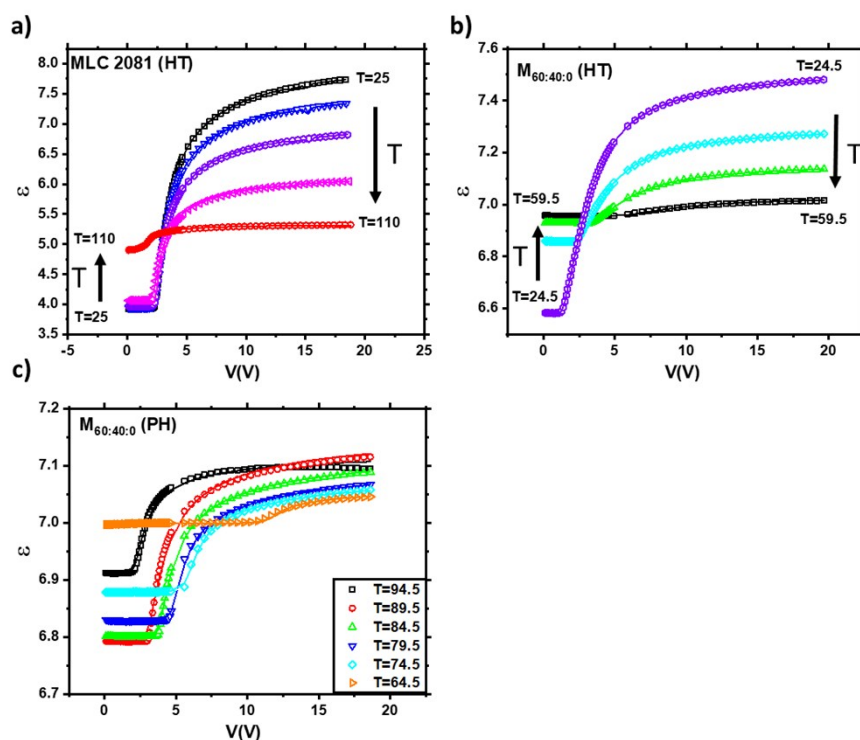

**SI figure 1:** Plots of  $\epsilon$  vs voltage in MLC 2081 in homeotropic geometry,  $M_{60:40:0}$  in the homeotropic geometry and  $M_{60:40:0}$  in planar homogenous geometry respectively. The fittings are shown, as the connecting lines which were used to find  $k_{11}$ ,  $k_{33}$ ,  $\epsilon_{||}$  and  $\epsilon_{\perp}$ . Here the temperatures ( $T$ ) are given in  $^{\circ}\text{C}$ .

**SI Table 1.** Table of the fitting parameters attained by fittings shown in figure 4c using equation (13) with fitting errors.

| Elastic constant          | MLC 2081        | MLC 2081         | $M_{60:40:0}$   |
|---------------------------|-----------------|------------------|-----------------|
| Material                  | $k_{11}$        | $k_{33}$         | $k_{11}$        |
| $k_{ii}^0(\text{pN})$     | $28.0 \pm 0.4$  | $41 \pm 3$       | $23.2 \pm 0.7$  |
| $T_{\text{NI}}(\text{K})$ | $375.2 \pm 0.1$ | $374.2 \pm 0.07$ | $359.7 \pm 0.1$ |
